# Supplementary material for: A Fisetin Delivery System for Neuroprotection: A Co-Amorphous Dispersion Prepared in Supercritical Carbon Dioxide
Source: MDPI journal article supplement (doi:10.3390/antiox13010024), 2023-12-21
Supplement: s1 [file s1]

Article

# Supercritical Carbon Dioxide-Induced Amorphous Fisetin: A Promising Candidate for Alzheimer's Therapy and Microbiome Modulation

Szymon Sip <sup>1</sup>, Natalia Rosiak <sup>1</sup>, Anna Sip <sup>2</sup> and Judyta Cielecka-Piontek <sup>1,\*</sup>

<sup>1</sup> Department of Pharmacognosy and Biomaterials, Poznan University of Medical Sciences, Rokietnicka 3, 60-806 Poznan, Poland; szymonsip@ump.edu.pl

<sup>2</sup> Department of Biotechnology and Food Microbiology, Poznan University of Life Sciences, Wojska Polskiego 48, 60-627 Poznan, Poland; anna.sip@up.poznan.pl

\* Correspondence: jpiontek@ump.edu.pl

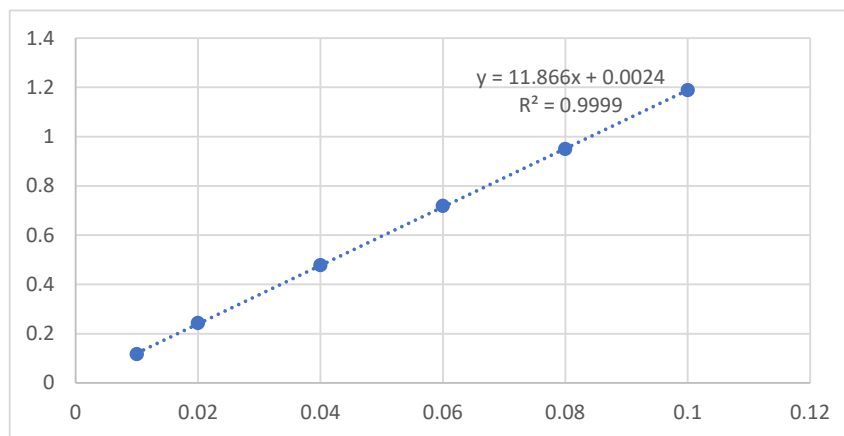

**Figure S1.** Standard curve for the conversion of antioxidant activity in the FRAP assay for Trolox

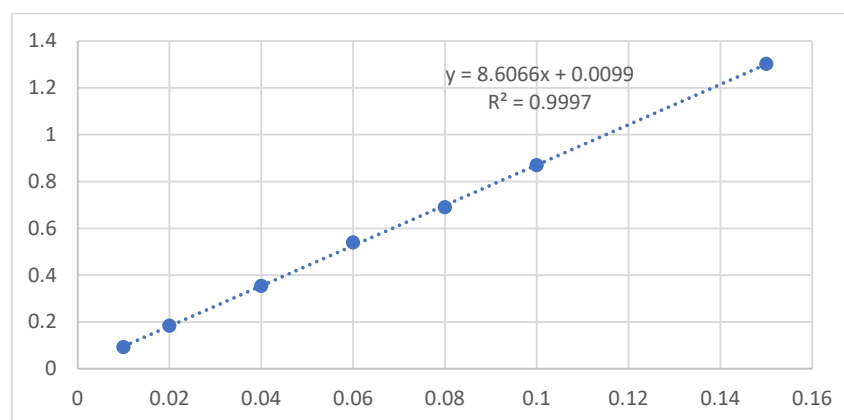

**Figure S2.** Standard curve for the conversion of antioxidant activity in the CUPRAC assay for Trolox

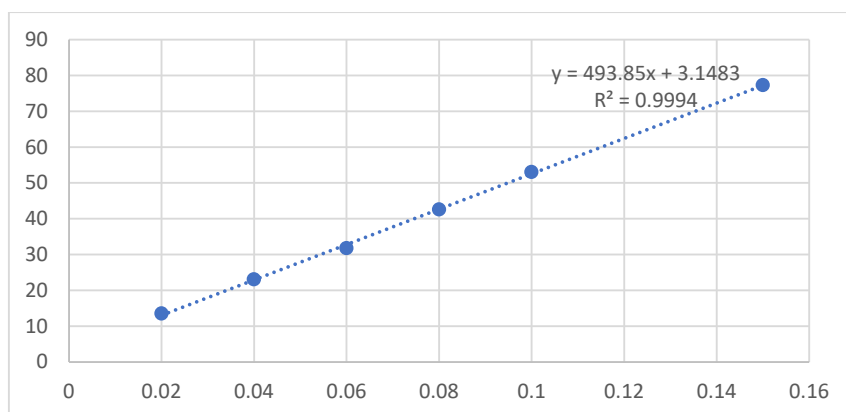

**Figure S3.** Standard curve for the conversion of antioxidant activity in the DPPH assay for Trolox

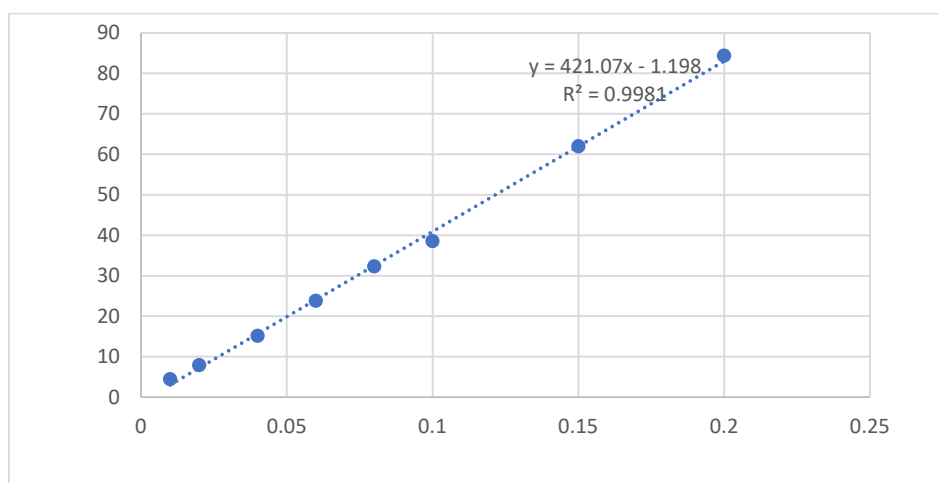

**Figure S4.** Standard curve for the conversion of antioxidant activity in the ABTS assay for Trolox

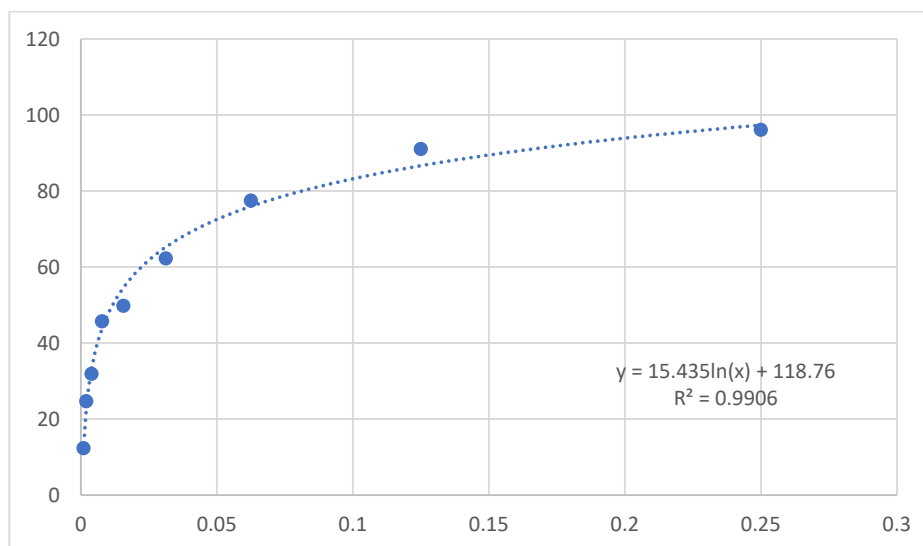

**Figure S5.** Acetylcholinesterase Inhibition Standard Curve for Galantamine

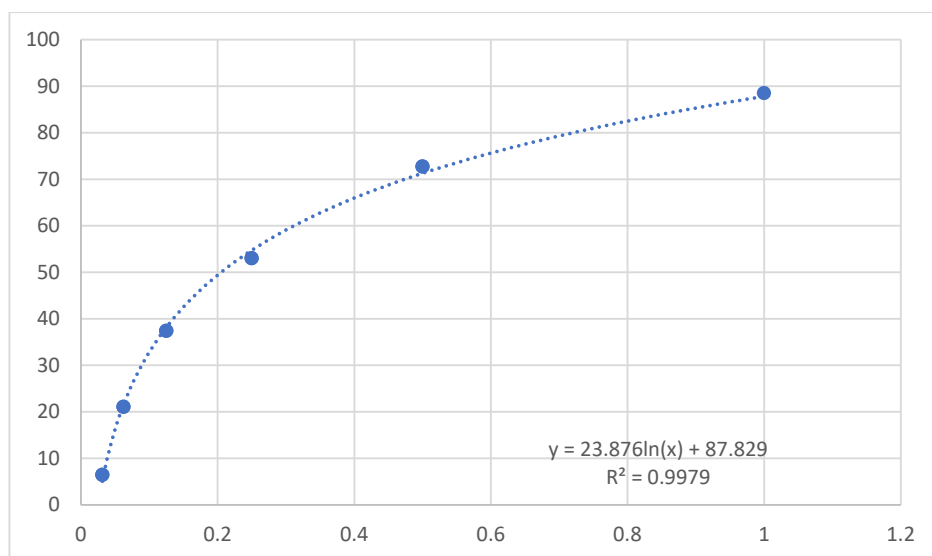

**Figure S6.** Butyrylcholinesterase Inhibition Standard Curve for Galantamine
